# Supplementary material for: A graph-convolutional neural network model for the prediction of chemical reactivity
Source: Royal Society of Chemistry journal article supplement (doi:10.1039/c8sc04228d), 2018-11-26

1.

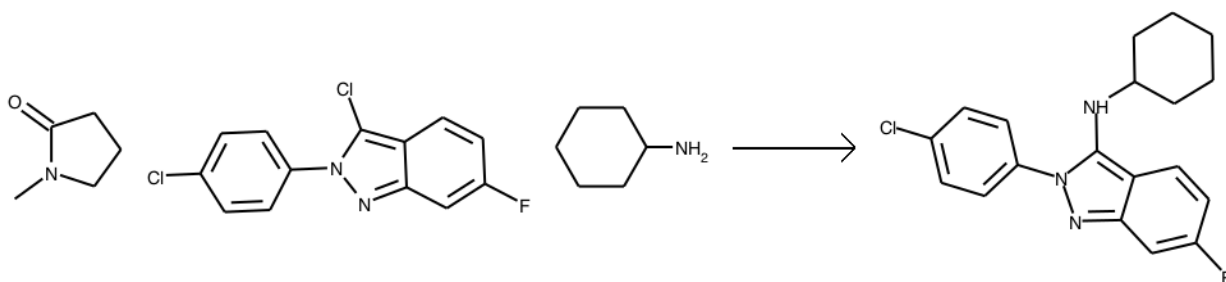

2.

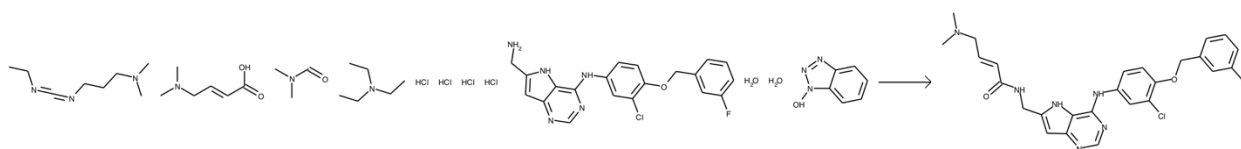

3.

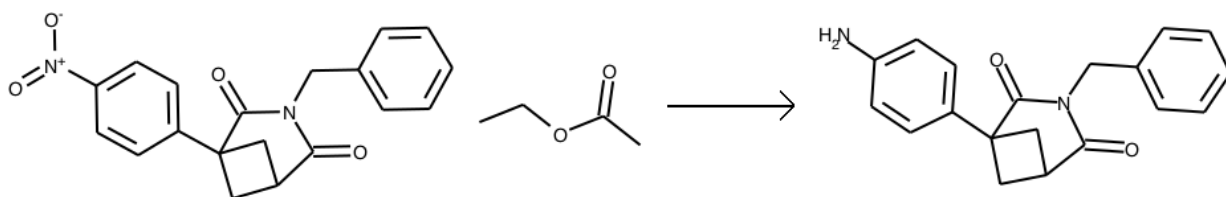

4.

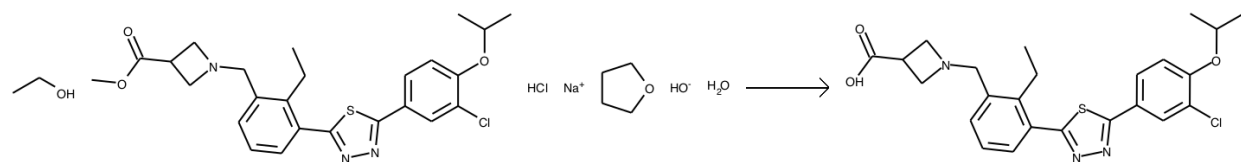

5.

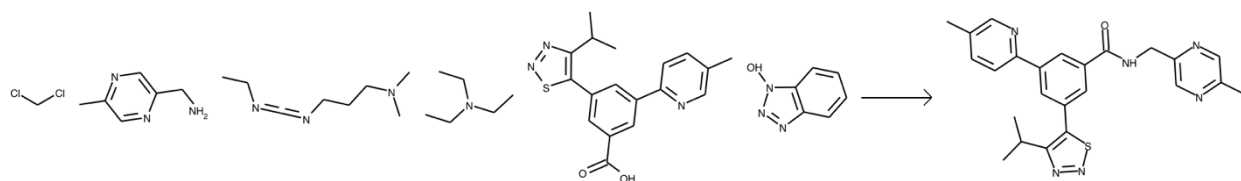

6.

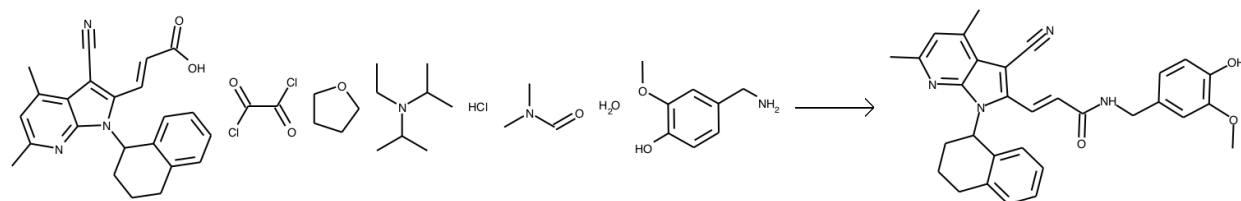

7.

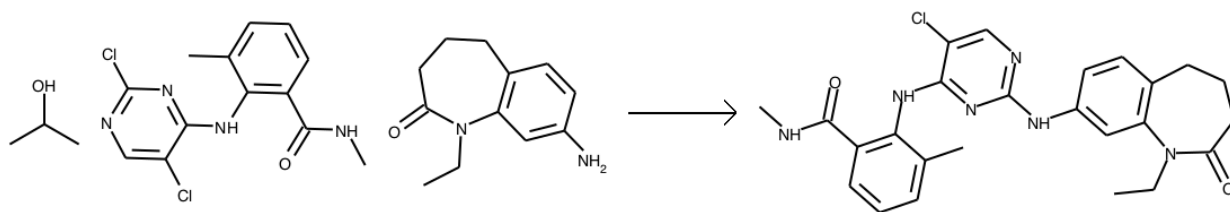

8.

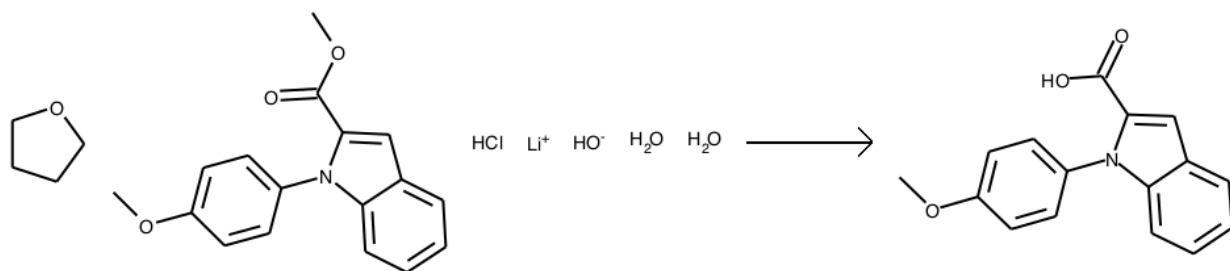

9.

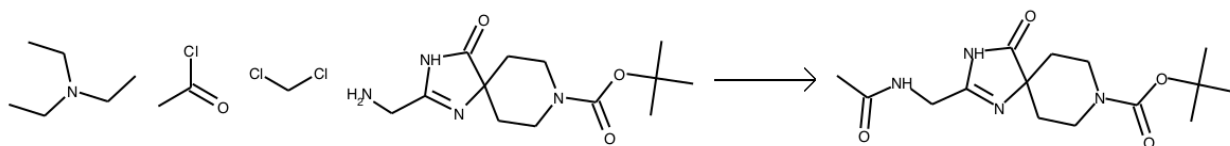

10.

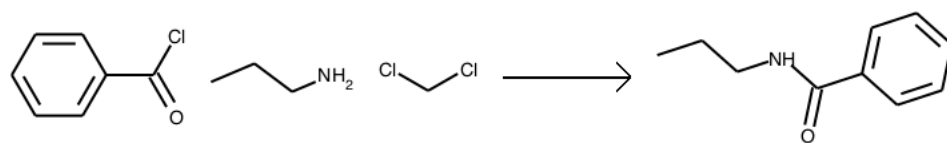

11.

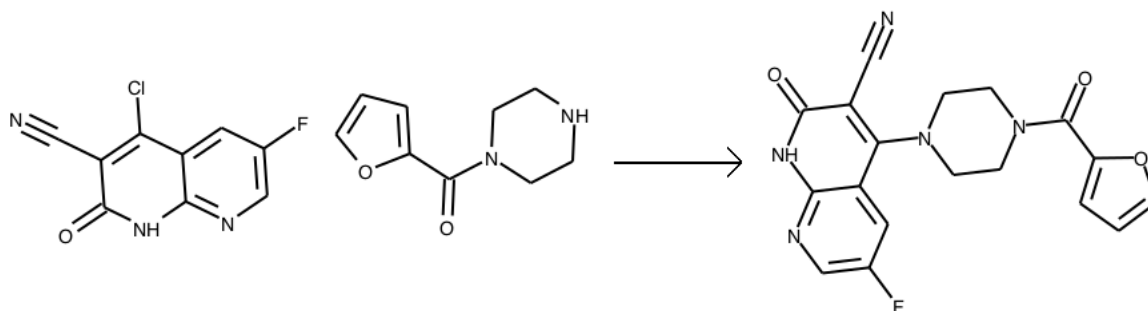

12.

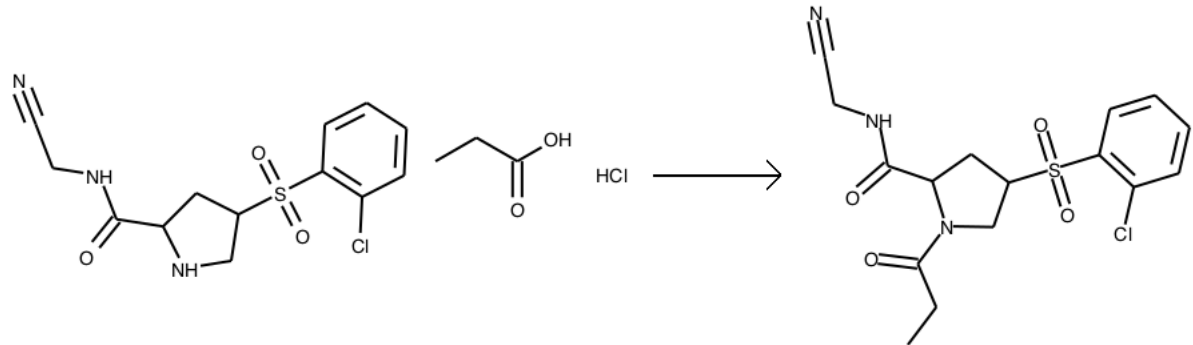

13.

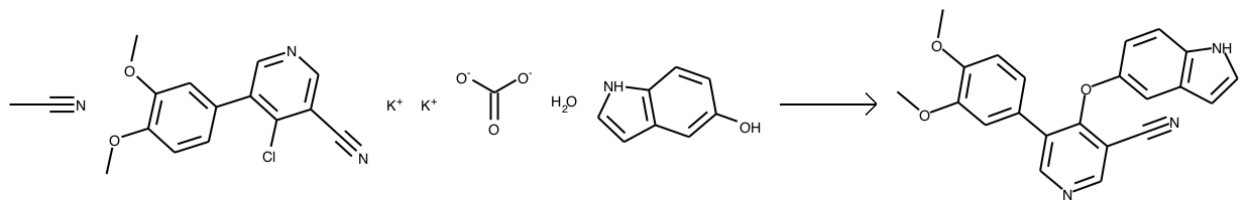

14.

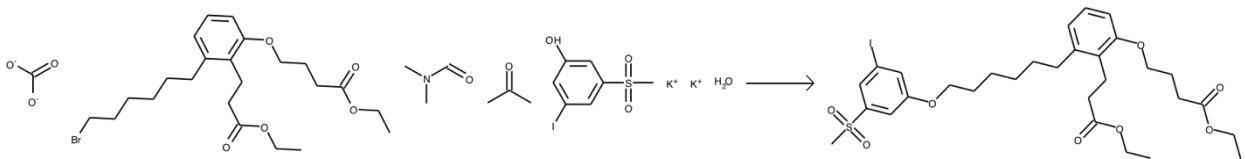

15.

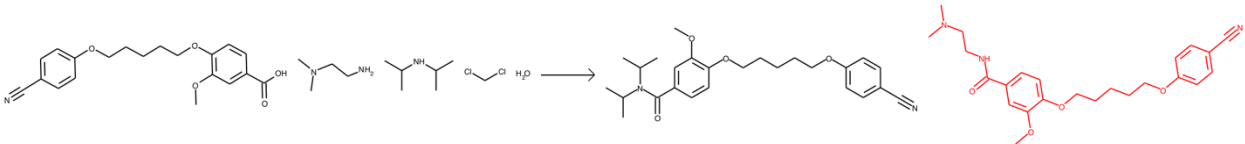

16.

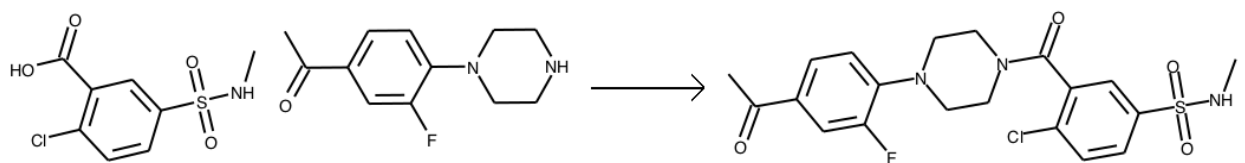

17.

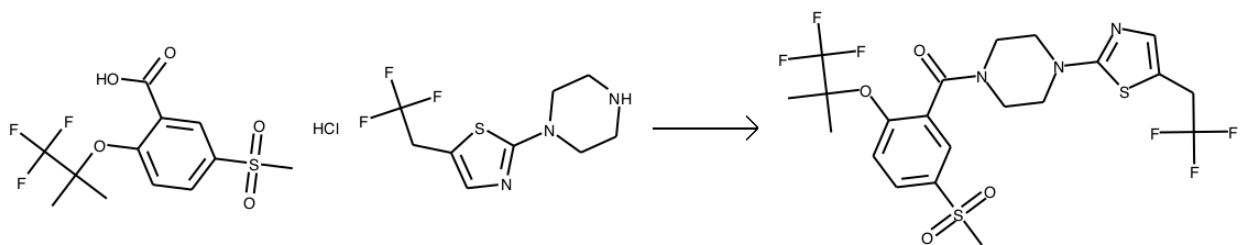





30.

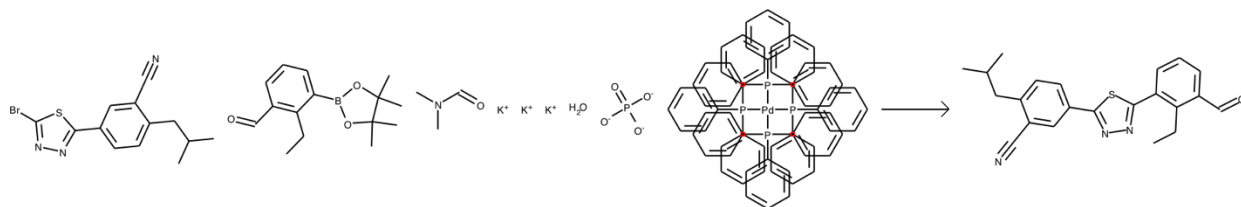

31.

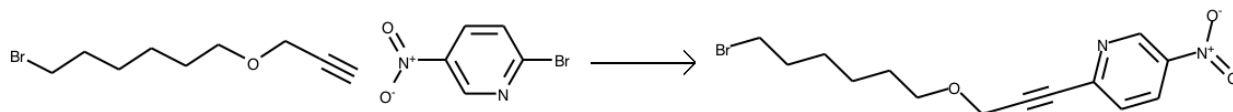

32.

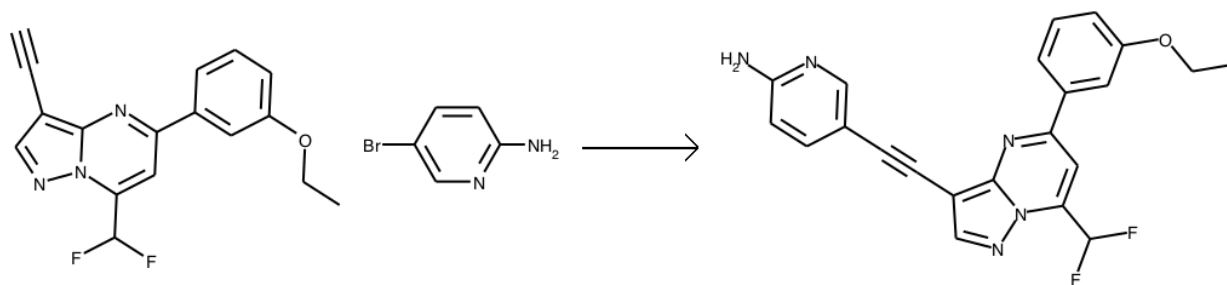

33.

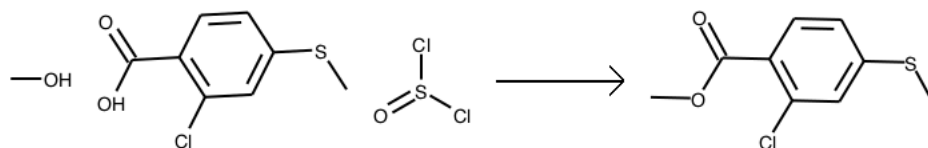

34.

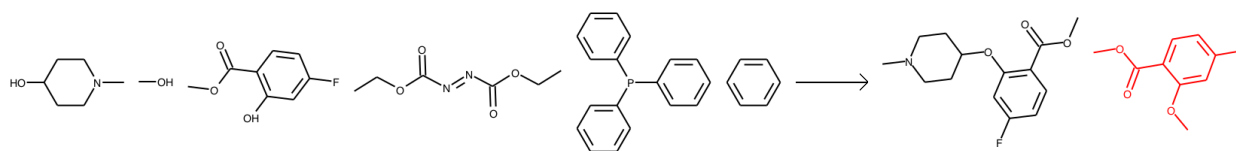

35.

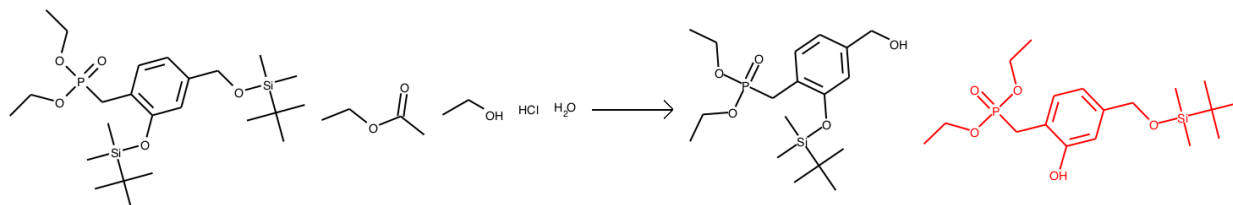



42.

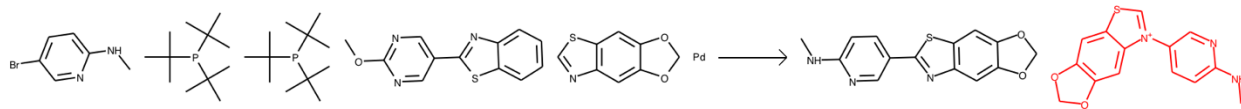

43.

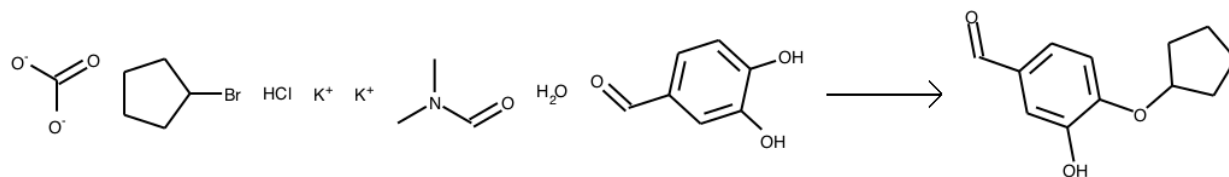

44.

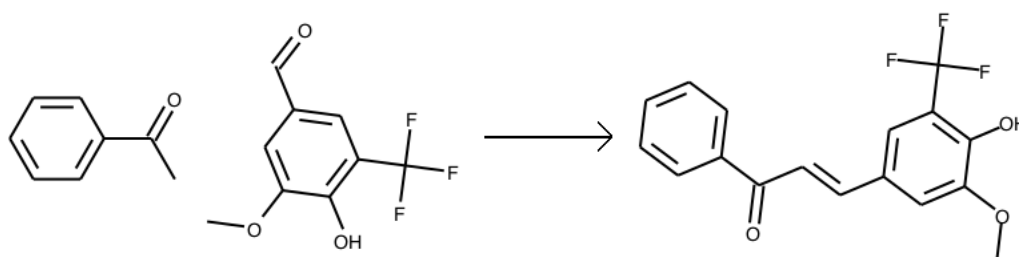

45.

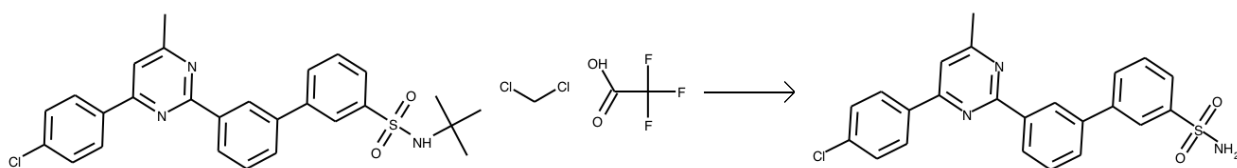

46.

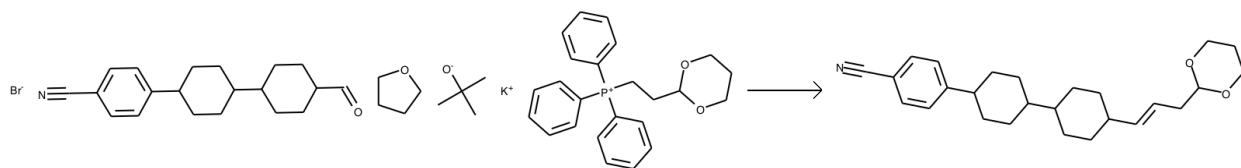

47.

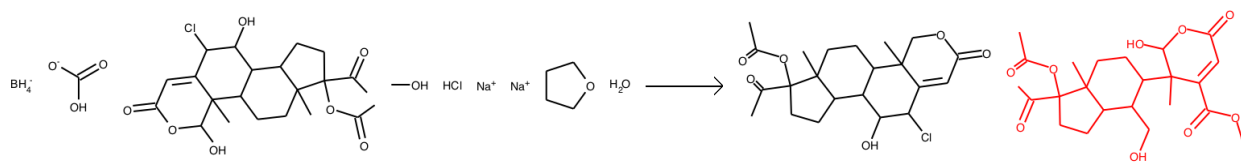

48.

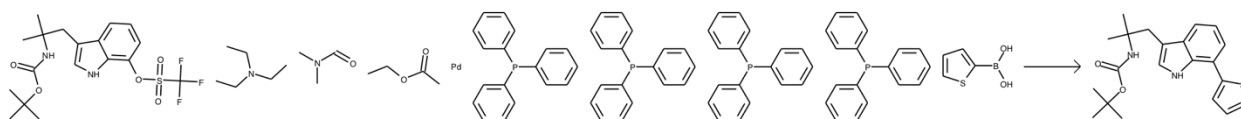



49.

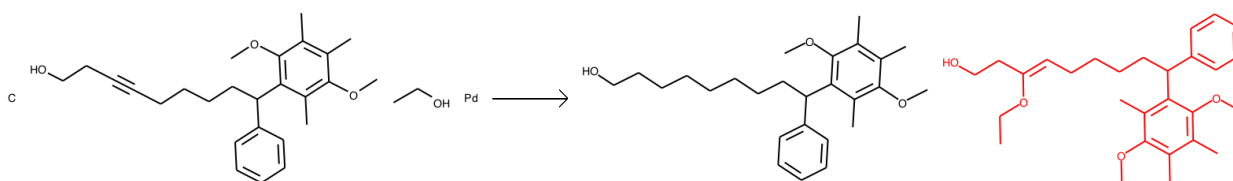

50.

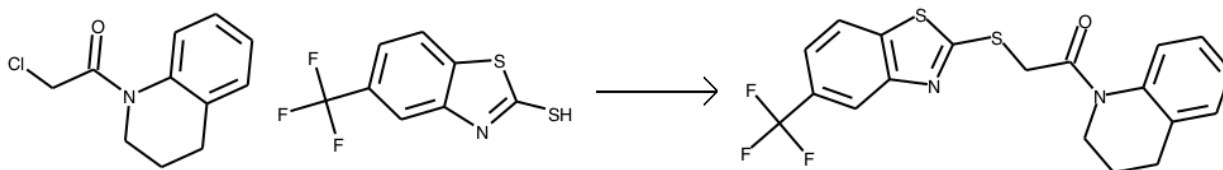

51.

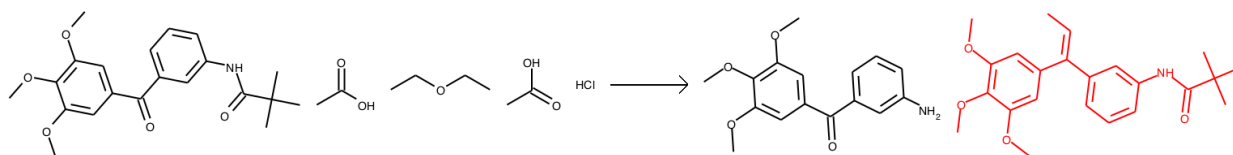

52.

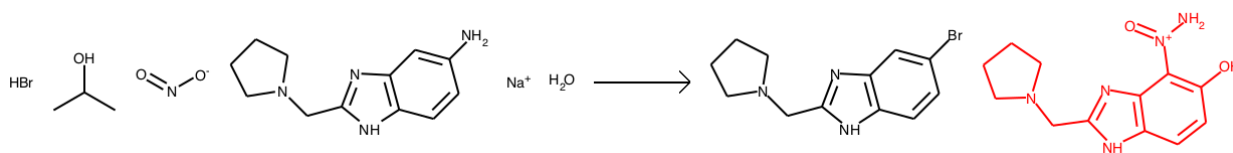

53.

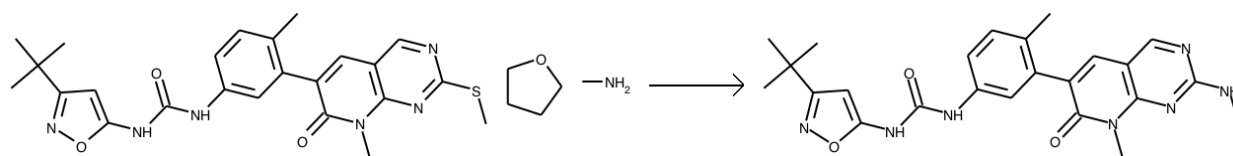

54.

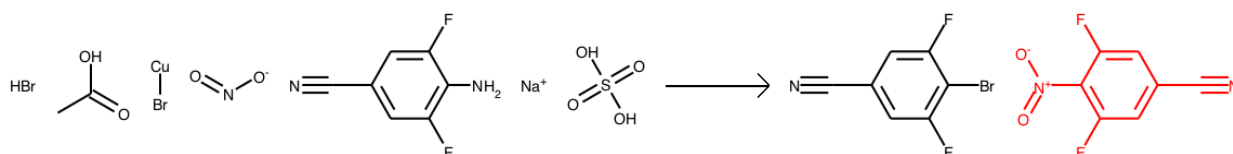

55.

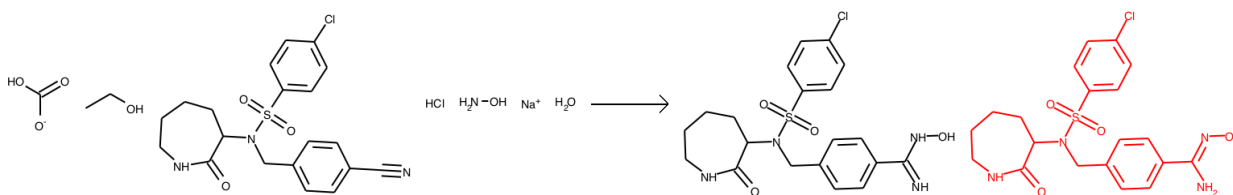

56.

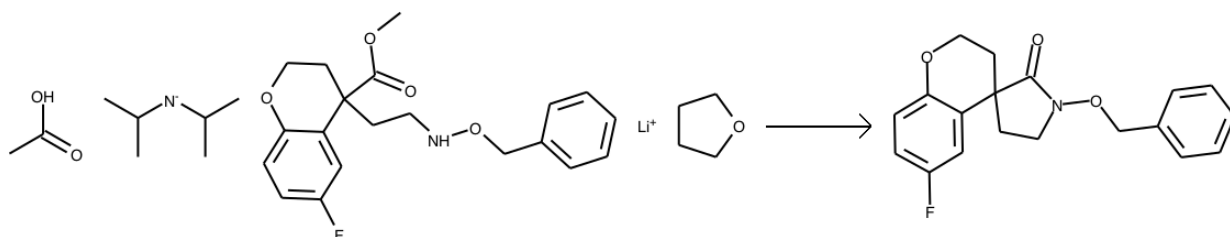

57.

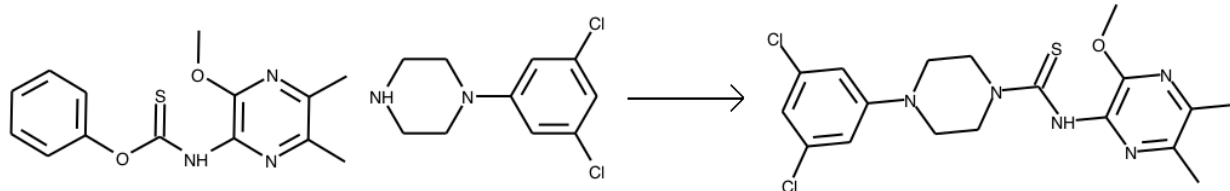

58.

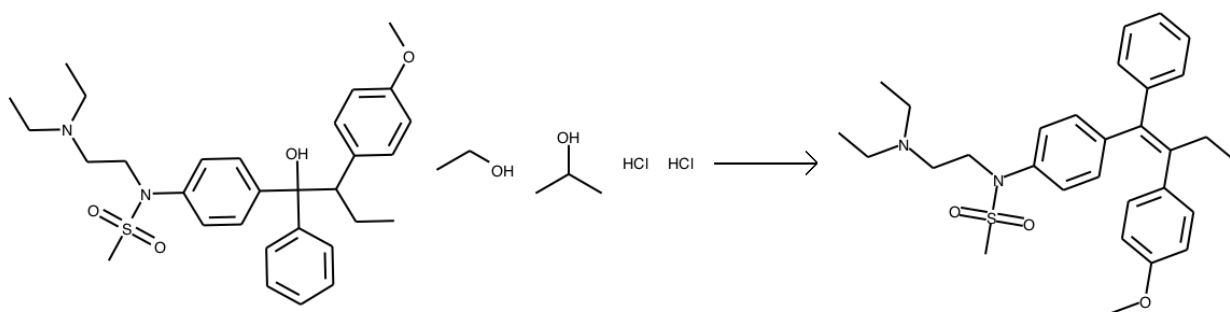

59.

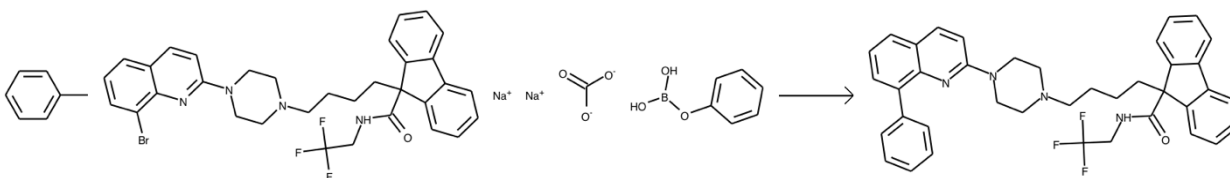

60.

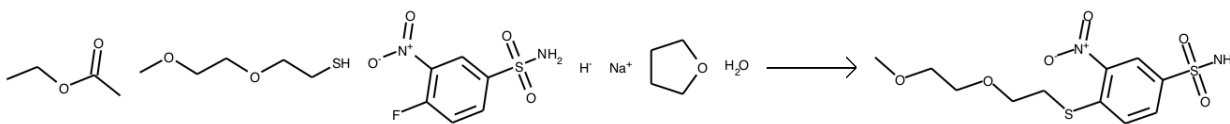

61.

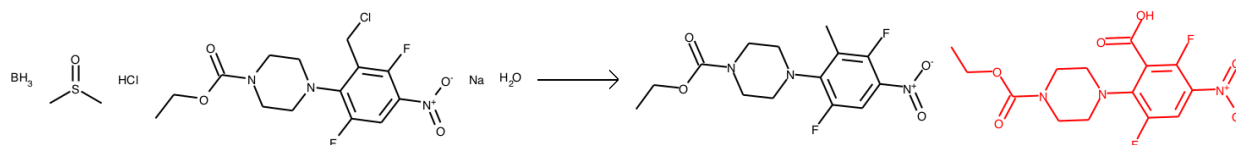

62.

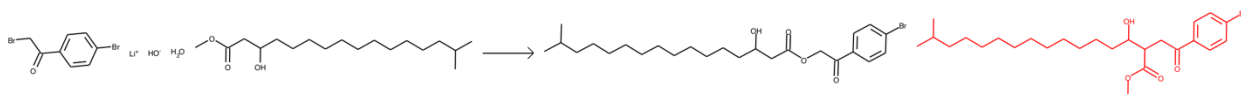

63.

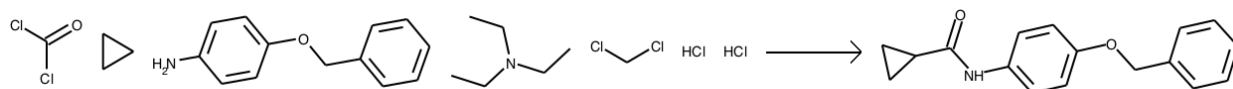

64.

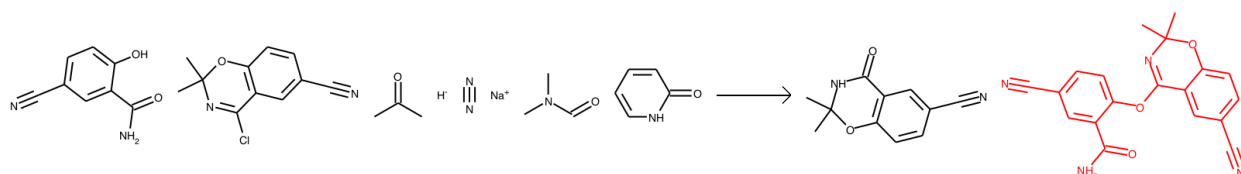

65.

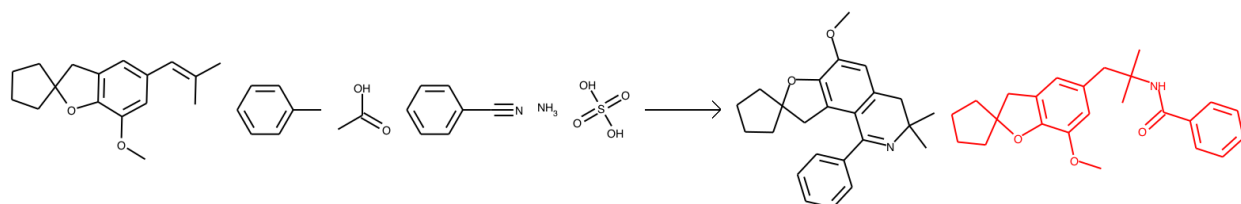

66.

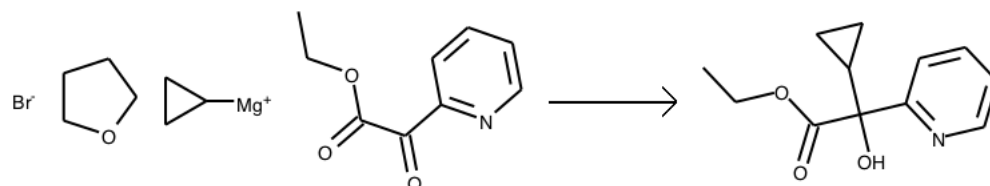

67.

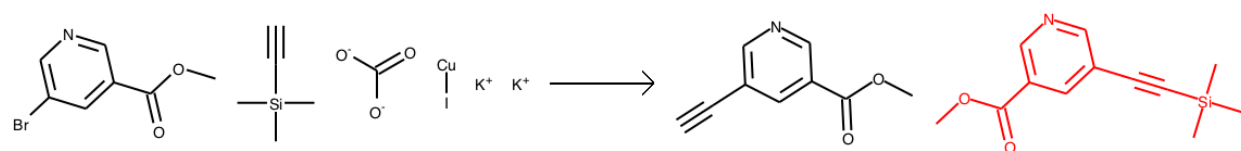

68.

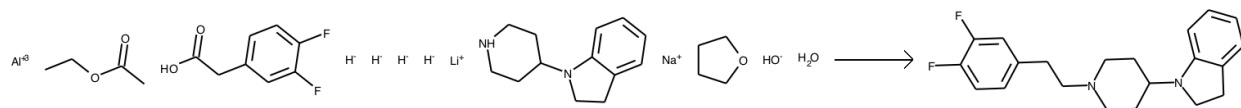

69.

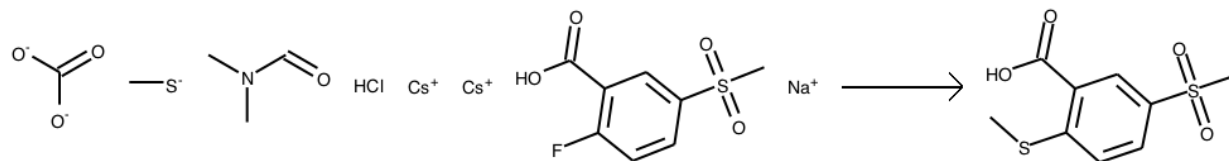

70.

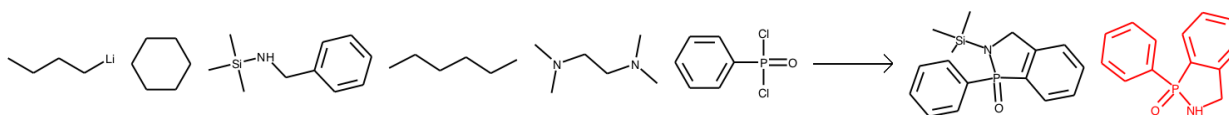

71.

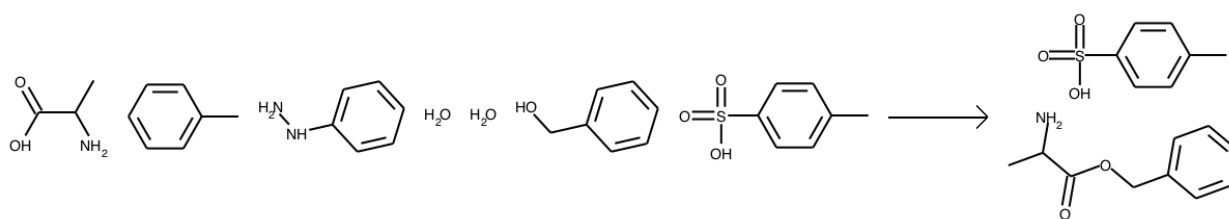

72.

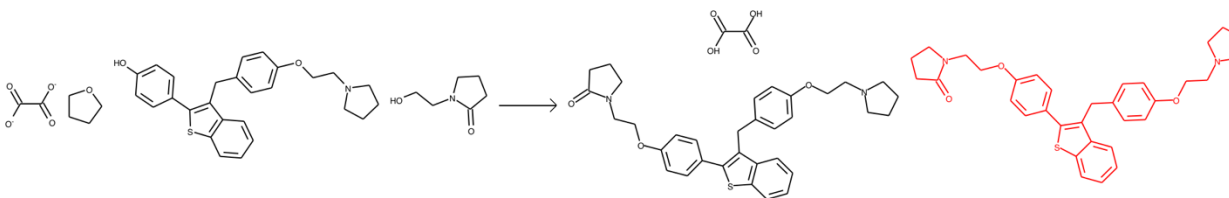

73.

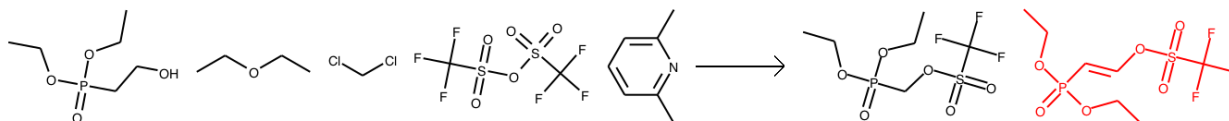

74.

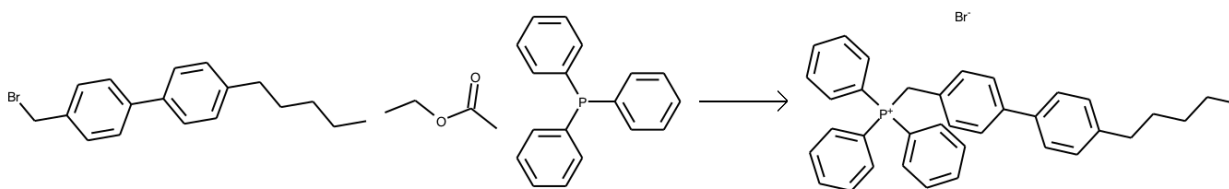

75.

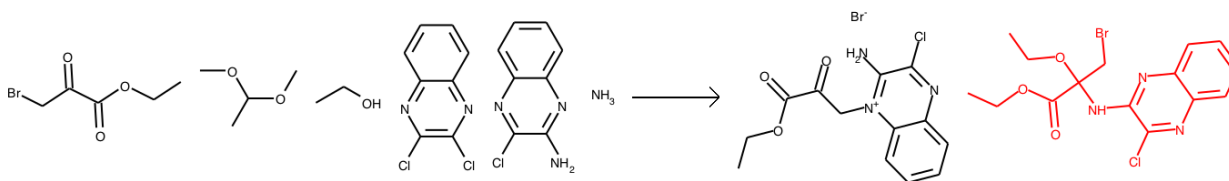

76.

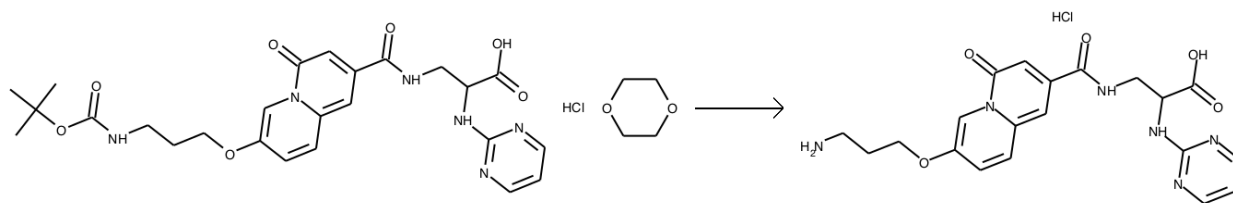

77.

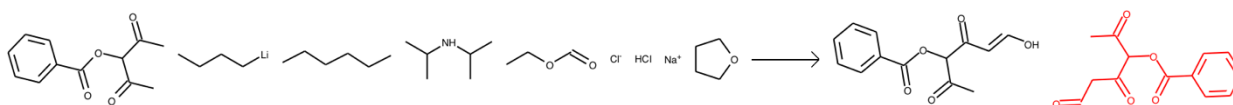

78.

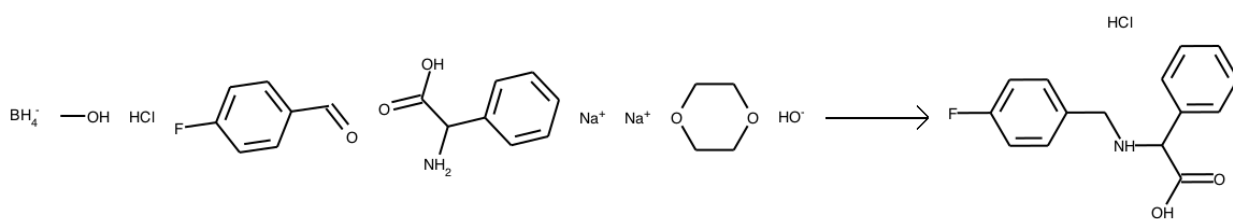

79.

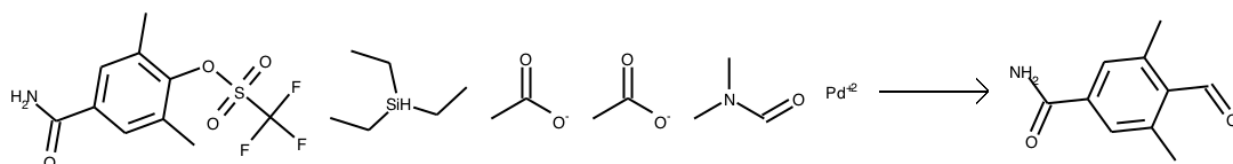

80.

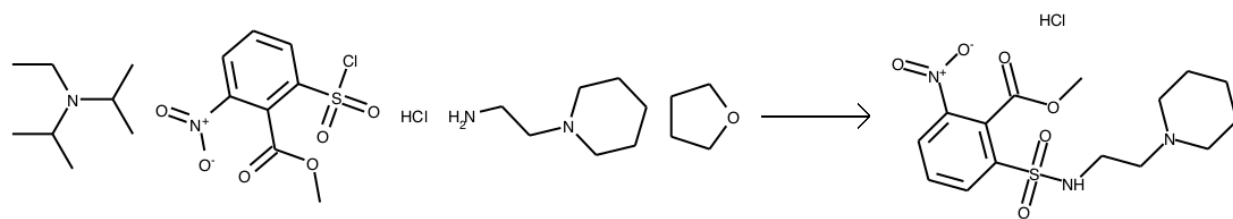

Supplement: c8sc04228d3.pdf [file c8sc04228d3.pdf]
